# Supplementary material for: Unraveling the mitochondrial genome of the medicinal Chinese motherwort (Leonurus japonicus, Lamiaceae): structural dynamics, organelle-to-nuclear gene transfer, and evolutionary implications
Source: Front Plant Sci. 2025 Jun 3;16:1546449. doi: 10.3389/fpls.2025.1546449 (PMC12170669; doi:10.3389/fpls.2025.1546449)
Supplement: Supplementary file 1 [file Table1.xlsx]

## Sheet: Table S1
TABLE S1. The ratio of nonsynonymous (Ka) and synonymous (Ks) substitution rates for conserved protein-coding genes in the mitogenome of L. japonicus and its relatives.
Gene	Ajuga ciliata	Scutellaria tsinyunensis	Ajuga reptans	Salvia miltiorrhiza	Rotheca serrata
atp1	0.248579	0.207525	0.296929	0.298612	0.215698
atp4	0.425296	NA	0.479511	2.00885	0.413004
atp6	0.105944	0.0618635	0.262892	0.0881893	0.105944
atp8	0.464302	NA	0.711749	0.474831	0.464302
atp9	0.0143434	0	0	0	0.0143434
ccmB	1.18703	0	0	0.338418	1.18703
ccmC	0.413048	0.540567	NA	0.331658	0.420838
ccmFC	0	0.401377	0.4068	0.463564	0.43268
ccmFN	0	0.571051	0.807419	0.647885	0.648192
cob	0.146188	0.41467	0.157788	0.471248	0.150265
cox1	0.0944681	0.0561404	0.0570039	0.368384	0.0956919
cox2	0	0.427237	0.139499	0.333922	0.163505
cox3	0.102647	0.128078	0.188753	0.682801	0.102647
matR	0.811616	0.635123	0.615446	0.611402	0.786447
mttB	0.246107	0	0.431634	0.6045	0.451739
nad1	0	0	0.141956	0	0
nad2	0.608988	0.348682	0.45634	0.260989	0.455471
nad3	0.19863	0.216318	0.452725	0.410681	0.19863
nad4	0.75678	0.639838	2.59696	0.34903	0.790342
nad4L	0	0.252732	NA	NA	0.18159
nad5	0.110483	0.460881	0.292871	0.317257	0.110483
nad6	0	0.143581	0	0.175254	0.257909
nad7	0	0.485477	0.615906	0.279542	0.615906
nad9	0.317626	0.293591	0.565827	0.97379	0.229963
orf101	0	0	0.459471	0	0
orf103b	0	0	1.3692	0	0
orf104a	0	0	0.377212	0	0
orf111c	0	0	1.39269	0	0
orf115a	0	0	0.216253	0	0
orf115c	0	0	0.203135	0	0
orf116a	0	0	0.386952	0	0
orf117a	0	0	0	0	0
orf121	0	0	0.633459	0	0
orf123	0	0	0.741506	0	0
orf131	0	0	0.475439	0	0
orf149	0	0	0.57262	0	0
orf182a	0	0	0.62828	0	0
orf214	0	0	0.387148	0	0
orf304	0	0	0.226687	0	0
rbcL	0	0	0.317512	0	0
rpl10	NA	NA	1.85527	0.435899	0
rpl16	0	0.139044	0.084709	0	0
rpl2	0.484019	0	0.443841	0	0.484019
rpl23	0.221891	0	NA	0	0.221891
rps10	0	0.524726	NA	0.369672	0
rps12	0	0.1179	NA	0.236295	0.154863
rps13	0.569652	1.01841	0.489333	0.748641	0.569652
rps3	0	0.240254	0.357079	0.428305	0.425585
rps4	0	0.385841	0.469698	0.620386	0.329746
sdh4	0	0.706224	0	0	0

## Sheet: Table S2
Table S2. Simple sequence repeats (SSRs) in the mitogenome of L. japonicus.
Mitochondrial genome	SSR nr.	SSR type	SSR	size	start	end
mtDNA	1	p1	(A)16	16	12074	12089
mtDNA	2	p3	(AAG)5	15	20901	20915
mtDNA	3	p1	(A)10	10	32361	32370
mtDNA	4	p6	(TTACCA)11	66	33283	33348
mtDNA	5	p1	(T)10	10	34254	34263
mtDNA	6	p2	(TC)6	12	45807	45818
mtDNA	7	p1	(A)10	10	56333	56342
mtDNA	8	p2	(AG)6	12	57377	57388
mtDNA	9	p1	(T)10	10	113193	113202
mtDNA	10	p1	(T)10	10	150814	150823
mtDNA	11	p1	(A)10	10	172155	172164
mtDNA	12	p1	(A)10	10	263910	263919
mtDNA	13	p2	(CT)6	12	276284	276295
mtDNA	14	p1	(T)10	10	283245	283254
mtDNA	15	p1	(T)10	10	292322	292331
mtDNA	16	p1	(A)10	10	293134	293143
mtDNA	17	p1	(T)10	10	310797	310806
mtDNA	18	p1	(T)10	10	314697	314706
mtDNA	19	p1	(T)13	13	331738	331750
mtDNA	20	p1	(A)10	10	356525	356534
mtDNA	21	p1	(A)10	10	377291	377300
mtDNA	22	p1	(G)11	11	377646	377656

## Sheet: Table S3
Table S3. Tandem repeat sequences in the mitogenome of L. japonicus.
Indices	Period	Copy	Consensus	Percent	Percent	Score	A	C	G	T	Entropy
	Size	Number	Size	Matches	Indels						(0-2)
14178--14211	17	1.9	18	88	5	52	17	14	32	35	1.91
15312--15392	36	2.2	36	95	0	144	14	25	9	49	1.75
32764--32798	17	2	18	94	5	63	48	22	0	28	1.51
33283--33352	6	11.7	6	100	0	140	32	32	0	34	1.58
97172--97250	34	2.3	34	100	0	158	25	13	40	20	1.89
120481--120604	41	3	41	100	0	248	32	14	21	31	1.93
163645--163685	21	2	21	90	0	64	19	34	14	31	1.92
193655--193693	18	2.3	17	86	8	53	17	30	20	30	1.96
193659--193693	18	1.9	18	94	0	61	20	28	20	31	1.97
227696--227755	31	2	31	90	3	95	40	21	8	30	1.83
251954--251994	21	2	21	90	0	64	36	21	21	19	1.95
260712--260750	19	2.1	19	90	0	60	43	10	25	20	1.83
261530--261555	13	2	13	100	0	52	53	0	23	23	1.46

## Sheet: Table S4
Table S4. Dispersed repeat sequences in the mitogenome of L. japonicus.
The repeat length of the first part	The starting site of the first part	Matching direction	The repeat length of the second part	The starting site of the second part	Interval distance of repeats	E-value
4625	215233	F	4625	305321	0	0
4506	319375	F	4506	348439	0	0
3004	72285	P	3004	104717	0	0
959	71320	P	959	107727	0	0
812	250238	F	812	273979	0	0
432	166415	P	432	383147	0	3.38e-250
251	67984	F	251	158693	0	3.17e-141
237	18834	F	237	250202	0	8.51e-133
201	18870	F	201	273979	0	4.02e-111
143	12757	F	143	192201	0	3.34e-76
141	632	F	141	383578	0	5.34e-75
105	201306	P	105	266788	0	2.52e-53
83	2316	P	83	166032	0	4.44e-40
83	120480	F	83	120521	0	4.44e-40
81	121169	P	81	277080	0	7.1e-39
80	17932	P	80	206183	0	2.84e-38
74	146674	F	74	310484	0	1.16e-34
68	33282	R	68	33282	0	4.77e-31
66	33286	R	66	33286	0	7.63e-30
64	33282	F	64	33288	0	1.22e-28
62	33282	R	62	33282	0	1.95e-27
60	33292	R	60	33292	0	3.12e-26
58	9714	F	58	217461	0	5e-25
58	9714	F	58	307549	0	5e-25
58	33282	F	58	33294	0	5e-25
57	147786	F	57	369087	0	2e-24
56	33282	R	56	33282	0	8e-24
55	27372	P	55	34354	0	3.2e-23
54	33298	R	54	33298	0	1.28e-22
52	170892	P	52	332985	0	2.05e-21
52	33282	F	52	33300	0	2.05e-21
50	33282	R	50	33282	0	3.27e-20
49	280271	P	49	343293	0	1.31e-19
48	33304	R	48	33304	0	5.24e-19
46	9834	F	46	146699	0	8.38e-18
46	9834	F	46	310509	0	8.38e-18
46	33282	F	46	33306	0	8.38e-18
45	14956	F	45	372022	0	3.35e-17
45	97171	F	45	97205	0	3.35e-17
44	33282	R	44	33282	0	1.34e-16
43	36298	P	43	56652	0	5.37e-16
42	33310	R	42	33310	0	2.15e-15
42	10209	P	42	204371	0	2.15e-15
42	120480	F	42	120562	0	2.15e-15
40	33282	F	40	33312	0	3.43e-14
39	9794	F	39	341382	0	1.37e-13
38	33282	R	38	33282	0	5.49e-13
37	2354	P	37	51426	0	2.2e-12
37	264349	P	37	273938	0	2.2e-12
37	51426	F	37	166040	0	2.2e-12
37	153796	F	37	241617	0	2.2e-12
36	33316	R	36	33316	0	8.79e-12
36	28222	P	36	197438	0	8.79e-12
36	115494	P	36	353788	0	8.79e-12
36	154842	P	36	182502	0	8.79e-12
35	73037	P	35	184008	0	3.52e-11
35	14380	F	35	158438	0	3.52e-11
35	106934	F	35	184008	0	3.52e-11
34	108321	P	34	111846	0	1.41e-10
34	191692	P	34	278782	0	1.41e-10
34	33282	F	34	33318	0	1.41e-10
34	71651	F	34	111846	0	1.41e-10
32	33282	R	32	33282	0	2.25e-09
32	9538	P	32	217522	0	2.25e-09
32	9538	P	32	307610	0	2.25e-09
32	36713	P	32	226564	0	2.25e-09
32	59895	P	32	293310	0	2.25e-09
32	15311	F	32	15347	0	2.25e-09
32	27416	F	32	70701	0	2.25e-09
32	295412	F	32	315053	0	2.25e-09
31	36923	P	31	226352	0	9e-09
31	58071	P	31	114127	0	9e-09
31	51420	F	31	264090	0	9e-09
31	146688	F	31	341411	0	9e-09
31	218125	F	31	218629	0	9e-09
31	218125	F	31	308717	0	9e-09
31	218629	F	31	308213	0	9e-09
31	264067	F	31	340261	0	9e-09
31	308213	F	31	308717	0	9e-09
31	310498	F	31	341411	0	9e-09
30	33322	R	30	33322	0	3.6e-08
30	18998	P	30	197440	0	3.6e-08
30	115467	P	30	234656	0	3.6e-08
30	197440	P	30	250366	0	3.6e-08
30	197440	P	30	274107	0	3.6e-08
30	206004	P	30	341286	0	3.6e-08
30	18998	F	30	28226	0	3.6e-08
30	28226	F	30	250366	0	3.6e-08
30	28226	F	30	274107	0	3.6e-08
30	224827	F	30	341363	0	3.6e-08

## Sheet: Table S5
TABLE S5. Relative synonymous codon usage (RSCU) of each amino acid pair codon in the mitogenome and plastome of L. japonicus.
Amino Acids	Codon	Mitochondrial RSCU	Chloroplast RSCU
Ala	GCU	1.6	1.74
	GCA	1	1.06
	GCC	0.88	0.67
	GCG	0.52	0.53
Arg	AGA	1.47	1.7
	CGA	1.25	1.39
	CGU	1.1	1.28
	AGG	0.76	0.64
	CGG	0.74	0.53
	CGC	0.67	0.46
Asn	AAU	1.32	1.54
	AAC	0.68	0.46
Asp	GAU	1.32	1.63
	GAC	0.68	0.37
Cys	UGU	1.19	1.49
	UGC	0.81	0.51
Gln	CAA	1.47	1.54
	CAG	0.53	0.46
Glu	GAA	1.41	1.53
	GAG	0.59	0.47
Gly	GGA	1.48	1.59
	GGU	1.19	1.26
	GGG	0.79	0.71
	GGC	0.55	0.44
His	CAU	1.5	1.54
	CAC	0.5	0.46
Ile	AUU	1.33	1.5
	AUC	0.88	0.61
	AUA	0.8	0.89
Leu	UUA	1.41	1.9
	CUU	1.3	1.27
	UUG	1.13	1.23
	CUA	1.01	0.81
	CUC	0.62	0.38
	CUG	0.53	0.41
Lys	AAA	1.27	1.52
	AAG	0.73	0.48
Met	AUG	6.91	1
	UUG	0.07
	CUG	0.02
Phe	UUU	1.15	1.36
	UUC	0.85	0.64
Pro	CCU	1.43	1.43
	CCA	1.1	1.08
	CCC	0.86	0.89
	CCG	0.62	0.6
Ser	UCU	1.31	1.64
	UCA	1.14	1.13
	AGU	1.09	1.27
	UCC	0.96	1.01
	UCG	0.76	0.59
	AGC	0.73	0.36
Ter	UAA	1.4	1.5
	UGA	0.98	0.75
	UAG	0.62	0.75
Thr	ACU	1.39	1.57
	ACC	1.1	0.79
	ACA	1	1.14
	ACG	0.51	0.5
Trp	UGG	1	1
Tyr	UAU	1.43	1.64
	UAC	0.57	0.36
Val	GUU	1.25	1.49
	GUA	1.2	1.49
	GUC	0.82	0.49
	GUG	0.73	0.54

## Sheet: Table S6
Table S6. Species information for phylogenetic analysis.
Order	Species and mitochondrial genome information	NCBI accession
Lamiales	Leonurus japonicus	PV368446
	Salvia miltiorrhiza mitochondrion, complete genome	NC023209
	Rotheca serrata mitochondrion, complete genome	NC049064
	Ajuga reptans mitochondrion, complete genome	NC023103
	Utricularia reniformis mitochondrion, complete genome	NC034982
	Castilleja paramensis mitochondrion, complete genome	NC031806
	Hesperelaea palmeri voucher E. Palmer 81 (MO) mitochondrion, complete genome	NC031323
	Boea hygrometrica mitochondrion, complete genome	NC016741
	Mimulus guttatus mitochondrion, complete genome	NC018041
	Osmanthus fragrans mitochondrion, complete genome	MW645067
	Scutellaria tsinyunensis mitochondrion, complete genome	MW553042
	Dolichandrone spathacea chromosome DS1 mitochondrion, complete sequence	MW432179
	Markhamia cauda-felina mitochondrion, complete genome	MW432178
	Ajuga ciliata chromosome 1 mitochondrion, complete sequence	MT075725
	Ligustrum quihoui mitochondrion, complete genome	MN723864
	Haberlea rhodopensis mitochondrion, complete genome	MH757117
Solanales	Solanum lycopersicum bio-material TGRC:LA1421 mitochondrion, complete genome	NC035963
	Solanum melongena isolate NN20 mitochondrion, complete genome	NC050334
	Nicotiana sylvestris cultivar TW 137 mitochondrion, complete genome	NC029805
	Nicotiana tabacum mitochondrion, complete genome	NC006581
Ericales	Camellia sinensis mitochondrion, complete genome	NC043914
	Vaccinium macrocarpon mitochondrion, complete genome	NC023338
Asterales	Helianthus annuus mitochondrion, complete genome	NC023337
	Codonopsis lanceolata mitochondrion, complete genome	NC037949

## Sheet: Table S7
Table S7. Clean data for collinear analysis in the mitogenome between L. japonicus and closely related species in the Lamiales.
query	database	identity (%)	alignment	mismatch	gap	q. start	q. end	d. start	d. end	e-value	score
mtDNA	NC_049064.1	96.26	8882	197	56	362583	371385	311457	302632	0	14438
mtDNA	NC_049064.1	95.74	5097	117	33	354726	359774	334369	339413	0	8118
mtDNA	NC_049064.1	96.5	4537	100	18	374311	378828	23342	18846	0	7443
mtDNA	NC_049064.1	94.71	4118	113	37	146709	150776	215852	219914	0	6300
mtDNA	NC_049064.1	98.64	3152	31	4	209822	212968	52852	55996	0	5572
mtDNA	NC_049064.1	96.43	3252	70	19	341383	344608	245902	249133	0	5321
mtDNA	NC_049064.1	97.19	2959	63	10	169084	172036	242525	239581	0	4987
mtDNA	NC_049064.1	96.26	3050	64	17	278774	281789	111478	108445	0	4955
mtDNA	NC_049064.1	96.38	2926	71	12	327261	330160	55987	58903	0	4783
mtDNA	NC_049064.1	97.69	2685	60	2	241667	244350	32578	29895	0	4614
mtDNA	NC_049064.1	96.29	2829	62	15	345619	348439	182484	185277	0	4602
mtDNA	NC_049064.1	94.87	2552	73	23	179365	181881	433944	431416	0	3934
mtDNA	NC_049064.1	95.04	2358	46	18	37040	39373	364105	366415	0	3640
mtDNA	NC_049064.1	95.42	2032	57	16	296876	298893	126607	124598	0	3205
mtDNA	NC_049064.1	94.75	2078	58	9	335898	337937	29506	27442	0	3186
mtDNA	NC_049064.1	94.42	2060	82	16	71169	73196	288175	290233	0	3136
mtDNA	NC_049064.1	95.73	1919	36	16	150827	152722	219933	221828	0	3048
mtDNA	NC_049064.1	98	1754	26	3	166858	168603	244266	242514	0	3037
mtDNA	NC_049064.1	94.58	1900	78	14	106811	108686	290233	288335	0	2915
mtDNA	NC_049064.1	95.15	1813	36	12	97589	99369	135823	137615	0	2813
mtDNA	NC_049064.1	98.6	1503	20	1	308709	310211	94678	93177	0	2658
mtDNA	NC_049064.1	95.6	1613	56	7	1	1609	336	1937	0	2571
mtDNA	NC_049064.1	97.48	1470	18	6	35598	37066	362636	364087	0	2492
mtDNA	NC_049064.1	94.9	1549	68	7	331364	332903	60370	61916	0	2412
mtDNA	NC_049064.1	94.75	1525	58	7	227763	229276	162063	160550	0	2353
mtDNA	NC_049064.1	98.55	1238	18	0	218621	219858	94678	93441	0	2187
mtDNA	NC_049064.1	99.42	1204	6	1	226526	227728	152816	151613	0	2183
mtDNA	NC_049064.1	96.43	1315	21	6	122776	124080	89679	90977	0	2145
mtDNA	NC_049064.1	95.9	1268	34	7	187628	188888	231307	232563	0	2037
mtDNA	NC_049064.1	94.66	1255	32	19	330135	331363	59093	60338	0	1914
mtDNA	NC_049064.1	95.1	1040	25	4	263069	264083	100055	99017	0	1615
mtDNA	NC_049064.1	97.24	943	15	4	239151	240088	158937	159873	0	1587
mtDNA	NC_049064.1	96.49	912	25	3	10213	11118	173405	174315	0	1500
mtDNA	NC_049064.1	90.92	1145	37	25	288074	289173	37268	38390	0	1476
mtDNA	NC_049064.1	97.38	841	19	2	75606	76446	73638	72801	0	1428
mtDNA	NC_049064.1	94.4	911	18	11	186767	187654	107557	108457	0	1369
mtDNA	NC_049064.1	95.73	844	23	7	100625	101462	112199	113035	0	1347
mtDNA	NC_049064.1	93.43	867	44	8	91118	91977	384525	383665	0	1273
mtDNA	NC_049064.1	94.42	824	23	11	166034	166847	312370	311560	0	1245
mtDNA	NC_049064.1	90.73	960	42	13	183266	184208	464714	465643	0	1236
mtDNA	NC_049064.1	94	817	25	8	130340	131133	344826	344011	0	1216
mtDNA	NC_049064.1	97.72	703	16	0	220840	221542	270911	270209	0	1210
mtDNA	NC_049064.1	97.7	696	14	2	258347	259041	342513	341819	0	1195
mtDNA	NC_049064.1	95.92	736	9	7	59802	60520	86555	85824	0	1173
mtDNA	NC_049064.1	96.15	702	20	3	191348	192043	411152	410452	0	1140
mtDNA	NC_049064.1	98.58	634	7	2	138543	139176	158853	158222	0	1120
mtDNA	NC_049064.1	96.28	646	15	4	112527	113168	77557	76917	0	1051
mtDNA	NC_049064.1	95.59	658	18	7	332869	333517	83570	84225	0	1044
mtDNA	NC_049064.1	89.22	844	26	14	277326	278122	66665	67490	0	994
mtDNA	NC_049064.1	88.93	822	33	7	108627	109406	234252	233447	0	961
mtDNA	NC_049064.1	94.83	600	20	5	24523	25117	360819	360226	0	926
mtDNA	NC_049064.1	94.81	597	20	5	372101	372689	153538	152945	0	920
mtDNA	NC_049064.1	87.8	615	29	10	137014	137587	283524	284133	0	678
mtDNA	NC_049064.1	83.52	698	65	26	382381	383054	127461	126790	4e-172	606
NC_049064.1	NC_023103.1	94.33	9160	235	88	302420	311457	43385	52382	0	13778
NC_049064.1	NC_023103.1	94.1	4849	122	56	334641	339418	100471	95716	0	7219
NC_049064.1	NC_023103.1	95.82	4427	112	22	18846	23230	255269	250874	0	7083
NC_049064.1	NC_023103.1	97.64	3395	49	12	52625	55996	123328	126714	0	5797
NC_049064.1	NC_023103.1	93.38	3443	109	47	108459	111848	183402	186778	0	4985
NC_049064.1	NC_023103.1	96.27	2974	68	15	239575	242525	25760	28713	0	4837
NC_049064.1	NC_023103.1	97.21	2614	71	2	29880	32491	320433	317820	0	4421
NC_049064.1	NC_023103.1	95.91	2591	62	19	182484	185037	278108	275525	0	4157
NC_049064.1	NC_023103.1	89.4	3453	145	65	12480	15828	104715	101380	0	4145
NC_049064.1	NC_023103.1	97.01	2472	34	11	135828	138299	226746	224315	0	4119
NC_049064.1	NC_023103.1	94.55	2549	64	32	364105	366604	193804	196326	0	3868
NC_049064.1	NC_023103.1	96.95	2095	30	10	242514	244592	29196	31272	0	3483
NC_049064.1	NC_023103.1	94.9	2098	61	16	431841	433909	152364	150284	0	3240
NC_049064.1	NC_023103.1	95.2	2043	61	7	27675	29714	21566	23574	0	3195
NC_049064.1	NC_023103.1	94.19	1909	55	16	247692	249568	267970	266086	0	2859
NC_049064.1	NC_023103.1	96.07	1554	58	3	93131	94682	342221	340669	0	2529
NC_049064.1	NC_023103.1	87.74	2064	169	49	288171	290199	200176	198162	0	2333
NC_049064.1	NC_023103.1	98.82	1273	6	2	362816	364087	192566	193830	0	2259
NC_049064.1	NC_023103.1	94.32	1373	43	7	158992	160357	145771	147115	0	2071
NC_049064.1	NC_023103.1	91.75	1357	51	18	85371	86699	159817	161140	0	1829
NC_049064.1	NC_023103.1	94.96	1112	36	7	233882	234987	268946	270043	0	1725
NC_049064.1	NC_023103.1	90.29	1360	53	21	282784	284133	143767	142477	0	1707
NC_049064.1	NC_023103.1	90.63	1292	100	13	89748	91036	128976	130249	0	1696
NC_049064.1	NC_023103.1	96.59	1025	28	2	56	1073	280860	279836	0	1692
NC_049064.1	NC_023103.1	96.42	977	21	7	246441	247417	268928	267966	0	1598
NC_049064.1	NC_023103.1	93.9	1050	20	10	99017	100055	54990	53974	0	1544
NC_049064.1	NC_023103.1	90.22	1227	56	19	452204	453400	77037	78229	0	1543
NC_049064.1	NC_023103.1	93.9	1032	32	14	37368	38390	172593	173602	0	1528
NC_049064.1	NC_023103.1	89.63	1022	89	9	125449	126469	218624	217619	0	1284
NC_049064.1	NC_023103.1	92.32	924	26	16	107543	108457	71255	70368	0	1271
NC_049064.1	NC_023103.1	98.13	697	13	0	270210	270906	311780	312476	0	1216
NC_049064.1	NC_023103.1	95.96	743	21	7	311544	312283	330536	329800	0	1197
NC_049064.1	NC_023103.1	89.01	919	81	16	1131	2039	167704	168612	0	1120
NC_049064.1	NC_023103.1	92.08	770	51	7	215822	216587	119217	119980	0	1075
NC_049064.1	NC_023103.1	90.85	667	25	10	112227	112867	210254	209598	0	861
NC_049064.1	NC_023103.1	86.87	792	54	20	118820	119570	337160	336378	0	841
NC_049064.1	NC_023103.1	85.39	801	99	7	173405	174195	805	1597	0	815
NC_023103.1	MT075725.1	99.36	15747	51	8	65014	80726	232586	216855	0	28480
NC_023103.1	MT075725.1	99.27	15295	35	13	40815	56065	116030	131291	0	27553
NC_023103.1	MT075725.1	99.38	14575	50	7	95043	109586	138132	152697	0	26380
NC_023103.1	MT075725.1	99.11	9638	31	6	109594	119201	48327	57939	0	17270
NC_023103.1	MT075725.1	99.2	8923	32	5	4804	13706	16507	7604	0	16048
NC_023103.1	MT075725.1	99.62	7451	11	5	123430	130870	103069	95626	0	13588
NC_023103.1	MT075725.1	99.62	7023	21	2	317526	324548	201945	208961	0	12815
NC_023103.1	MT075725.1	99.49	6412	27	1	329750	336155	57907	64318	0	11653
NC_023103.1	MT075725.1	99.74	6198	11	1	17472	23664	266723	260526	0	11352
NC_023103.1	MT075725.1	99.68	5851	15	1	249775	255621	187189	181339	0	10696
NC_023103.1	MT075725.1	99.74	5476	14	0	264568	270043	287330	281855	0	10035
NC_023103.1	MT075725.1	99.31	5536	21	3	172328	177862	40866	35347	0	9997
NC_023103.1	MT075725.1	99.04	5119	27	5	149586	154687	34108	28995	0	9162
NC_023103.1	MT075725.1	99.74	4992	13	0	216303	221294	72333	77324	0	9147
NC_023103.1	MT075725.1	99.55	4880	14	1	244912	249783	192301	197180	0	8883
NC_023103.1	MT075725.1	99.58	4778	19	1	144876	149652	153708	158485	0	8711
NC_023103.1	MT075725.1	99.67	4596	15	0	166438	171033	170207	165612	0	8405
NC_023103.1	MT075725.1	99.62	4264	11	1	182189	186452	158419	162677	0	7781
NC_023103.1	MT075725.1	99.83	4158	7	0	192058	196215	234390	238547	0	7640
NC_023103.1	MT075725.1	99.7	4061	8	2	197596	201656	246431	250487	0	7430
NC_023103.1	MT075725.1	99.38	4003	16	1	88703	92705	88777	92770	0	7245
NC_023103.1	MT075725.1	99.78	3232	7	0	213077	216308	43351	46582	0	5930
NC_023103.1	MT075725.1	99.29	3103	13	1	1740	4833	19945	16843	0	5600
NC_023103.1	MT075725.1	99.56	2260	10	0	34005	36264	64423	66682	0	4119
NC_023103.1	MT075725.1	99.9	2089	2	0	14999	17087	246439	244351	0	3847
NC_023103.1	MT075725.1	98.05	2205	7	3	38619	40823	4861	2693	0	3801
NC_023103.1	MT075725.1	99.75	2038	4	1	291930	293967	71487	69451	0	3735
NC_023103.1	MT075725.1	99.03	2058	14	2	327719	329776	2052	1	0	3685
NC_023103.1	MT075725.1	99.73	1877	5	0	164537	166413	172070	170194	0	3439
NC_023103.1	MT075725.1	99.16	1777	13	2	340445	342221	108293	106519	0	3197
NC_023103.1	MT075725.1	99.35	1692	6	1	93373	95059	176849	175158	0	3059
NC_023103.1	MT075725.1	99.5	1600	6	1	1	1600	172570	174167	0	2909
NC_023103.1	MT075725.1	99.61	1546	6	0	270034	271579	198742	197197	0	2822
NC_023103.1	MT075725.1	99.48	1550	8	0	228612	230161	255635	254086	0	2819
NC_023103.1	MT075725.1	99.36	1397	4	1	159749	161140	28381	26985	0	2525
NC_023103.1	MT075725.1	99.34	1364	4	3	59019	60380	136803	138163	0	2464
NC_023103.1	MT075725.1	99.63	1338	5	0	162765	164102	42592	41255	0	2444
NC_023103.1	MT075725.1	99.91	1157	1	0	279704	280860	109811	110967	0	2132
NC_023103.1	MT075725.1	99.34	1059	2	1	130864	131917	95355	94297	0	1912
NC_023103.1	MT075725.1	99.8	1014	2	0	343951	344964	270673	269660	0	1862
NC_023103.1	MT075725.1	99.16	954	6	1	1	954	200827	199876	0	1716
NC_023103.1	MT075725.1	99.56	901	2	2	304946	305845	20485	21384	0	1640
NC_023103.1	MT075725.1	99.32	876	5	1	157239	158114	199015	199889	0	1583
NC_023103.1	MT075725.1	99.19	859	1	1	13813	14665	281713	280855	0	1543
NC_023103.1	MT075725.1	99.16	829	7	0	351241	352069	201656	200828	0	1493
NC_023103.1	MT075725.1	97.05	880	3	4	297154	298029	103919	103059	0	1459
NC_023103.1	MT075725.1	98.47	785	6	1	221283	222061	92710	93494	0	1378
NC_023103.1	MT075725.1	96.64	774	10	2	134421	135193	77676	78434	0	1271
NC_023103.1	MT075725.1	98.61	649	7	1	181605	182251	34694	34046	0	1147
NC_023103.1	MT075725.1	99.34	608	2	2	234702	235307	252874	253481	0	1099
MT075725.1	MW553042.1	96.06	5739	86	38	138805	144472	328318	333987	0	9217
MT075725.1	MW553042.1	94.78	5656	104	55	123263	128829	228671	223118	0	8634
MT075725.1	MW553042.1	96.98	4572	72	16	181550	186086	43477	38937	0	7618
MT075725.1	MW553042.1	94.44	4658	85	54	118305	122877	233228	228660	0	7007
MT075725.1	MW553042.1	97.89	3265	42	6	99791	103049	2625	5868	0	5622
MT075725.1	MW553042.1	94.11	3685	95	39	159050	162671	300445	296820	0	5491
MT075725.1	MW553042.1	98.4	2750	31	7	207043	209784	194876	197620	0	4822
MT075725.1	MW553042.1	91.39	3438	103	50	144474	147814	334125	337466	0	4530
MT075725.1	MW553042.1	98.19	2592	47	0	202243	204834	244787	247378	0	4527
MT075725.1	MW553042.1	91.9	2803	80	47	37887	40600	309430	306686	0	3783
MT075725.1	MW553042.1	96.68	2201	39	9	236363	238547	92299	94481	0	3629
MT075725.1	MW553042.1	93.98	2410	61	29	25938	28308	152474	150110	0	3570
MT075725.1	MW553042.1	97.47	2095	31	9	31316	33400	179678	177596	0	3555
MT075725.1	MW553042.1	94.42	2258	34	23	283925	286152	260625	262820	0	3387
MT075725.1	MW553042.1	96.81	1816	17	6	260833	262614	313088	311280	0	2994
MT075725.1	MW553042.1	96.32	1578	57	1	106491	108068	319416	317840	0	2591
MT075725.1	MW553042.1	98.83	1453	8	2	234895	236339	90802	92253	0	2580
MT075725.1	MW553042.1	88.15	2051	164	35	246997	249010	78991	76983	0	2368
MT075725.1	MW553042.1	95.11	1412	20	14	128833	130209	223024	221627	0	2180
MT075725.1	MW553042.1	95.26	1372	33	8	154604	155948	121545	122911	0	2145
MT075725.1	MW553042.1	91.44	1518	47	29	281488	282952	212785	211298	0	2006
MT075725.1	MW553042.1	97.45	982	12	5	282970	283940	259392	260371	0	1663
MT075725.1	MW553042.1	91.68	1190	97	2	96304	97492	277114	278302	0	1648
MT075725.1	MW553042.1	94.76	993	21	7	226299	227262	75828	74838	0	1517
MT075725.1	MW553042.1	89.91	1021	88	7	73649	74654	174824	173804	0	1301
MT075725.1	MW553042.1	94.92	787	23	4	57907	58693	59517	60286	0	1216
MT075725.1	MW553042.1	87.09	1100	102	19	74784	75852	48417	49507	0	1208
MT075725.1	MW553042.1	98.62	650	9	0	222248	222897	135712	136361	0	1151
MT075725.1	MW553042.1	91.92	681	55	0	168261	168941	163273	162593	0	953
MT075725.1	MW553042.1	94.34	601	23	2	158433	159026	301034	300438	0	911
MT075725.1	MW553042.1	93.29	596	22	8	98644	99221	20048	20643	0	863
MT075725.1	MW553042.1	85.27	774	106	5	173370	174136	237513	236741	0	791
MW553042.1	NC_023209.1	96.86	9333	104	53	328318	337564	70566	61337	0	15437
MW553042.1	NC_023209.1	97.52	5120	29	17	10765	15857	426655	431703	0	8661
MW553042.1	NC_023209.1	97.13	4848	50	21	38476	43289	5195	9987	0	8100
MW553042.1	NC_023209.1	98.07	4615	36	15	90787	95374	79497	74909	0	7980
MW553042.1	NC_023209.1	96.66	4706	40	33	222424	227084	328538	323905	0	7712
MW553042.1	NC_023209.1	96.29	4631	37	26	228660	233221	321931	317367	0	7474
MW553042.1	NC_023209.1	97.82	3811	20	18	2462	6245	34154	37928	0	6519
MW553042.1	NC_023209.1	96.42	3355	54	19	190118	193442	27857	31175	0	5470
MW553042.1	NC_023209.1	96.53	3108	26	14	125420	128490	286042	289104	0	5066
MW553042.1	NC_023209.1	95.36	3233	54	27	120793	123978	492215	489032	0	5051
MW553042.1	NC_023209.1	98.71	2631	34	0	244754	247384	343424	346054	0	4671
MW553042.1	NC_023209.1	96.12	2884	36	20	25545	28400	170965	168130	0	4636
MW553042.1	NC_023209.1	97.85	2555	25	10	205778	208313	472167	474710	0	4386
MW553042.1	NC_023209.1	96.37	2229	43	11	172935	175148	486280	484075	0	3633
MW553042.1	NC_023209.1	97.2	1966	17	9	297979	299930	450576	452517	0	3291
MW553042.1	NC_023209.1	93.94	2229	30	30	211298	213496	86758	88911	0	3271
MW553042.1	NC_023209.1	97.33	1832	12	10	311280	313088	178396	180213	0	3077
MW553042.1	NC_023209.1	95.15	1816	33	22	177609	179389	204718	206513	0	2815
MW553042.1	NC_023209.1	98.36	1583	23	3	317811	319392	103113	101533	0	2776
MW553042.1	NC_023209.1	97.88	1600	22	7	260547	262136	274034	272437	0	2756
MW553042.1	NC_023209.1	97.33	1573	14	7	227119	228671	323902	322338	0	2647
MW553042.1	NC_023209.1	95.67	1571	29	16	258791	260332	275587	274027	0	2488
MW553042.1	NC_023209.1	96.72	1340	32	6	22971	24310	173692	172365	0	2220
MW553042.1	NC_023209.1	98.86	1228	9	1	77812	79034	107162	108389	0	2185
MW553042.1	NC_023209.1	98.52	1216	13	1	48333	49548	292923	291713	0	2141
MW553042.1	NC_023209.1	95.96	1337	15	5	106737	108067	411747	413050	0	2134
MW553042.1	NC_023209.1	95.69	1323	17	10	74838	76143	193041	194340	0	2091
MW553042.1	NC_023209.1	94.72	1308	43	6	277128	278435	20494	19213	0	2010
MW553042.1	NC_023209.1	97.77	1166	13	3	296801	297958	449425	450585	0	1997
MW553042.1	NC_023209.1	94.51	1276	12	15	145906	147162	458669	459905	0	1916
MW553042.1	NC_023209.1	97.75	1113	21	3	352952	354061	394787	395898	0	1914
MW553042.1	NC_023209.1	93.73	1229	27	13	59323	60527	44555	43353	0	1797
MW553042.1	NC_023209.1	99.27	965	7	0	78070	79034	308280	309244	0	1744
MW553042.1	NC_023209.1	95.48	1105	19	10	24309	25386	172035	170935	0	1735
MW553042.1	NC_023209.1	95.98	1019	11	5	187067	188077	26897	27893	0	1628
MW553042.1	NC_023209.1	94.52	1004	17	4	300045	301017	266448	267444	0	1515
MW553042.1	NC_023209.1	97.92	864	11	4	162570	163426	138505	139368	0	1489
MW553042.1	NC_023209.1	90.79	1162	24	21	149941	151081	191322	190223	0	1476
MW553042.1	NC_023209.1	96.23	902	22	1	116696	117597	146214	145325	0	1467
MW553042.1	NC_023209.1	94.36	976	19	21	63231	64181	127770	126806	0	1465
MW553042.1	NC_023209.1	92.41	1014	27	23	213519	214514	88974	89955	0	1400
MW553042.1	NC_023209.1	96.3	865	9	8	76956	77811	106091	106941	0	1399
MW553042.1	NC_023209.1	96.95	819	10	8	147360	148170	404464	405275	0	1360
MW553042.1	NC_023209.1	95.26	844	23	8	253848	254680	50285	49448	0	1321
MW553042.1	NC_023209.1	95.85	698	11	9	221633	222312	329229	328532	0	1112
MW553042.1	NC_023209.1	92.42	765	50	7	236753	237513	383296	384056	0	1085
MW553042.1	NC_023209.1	96.37	662	5	2	296126	296774	448065	448720	0	1072
MW553042.1	NC_023209.1	90.22	603	33	6	209306	209908	419185	419761	0	763
MW553042.1	NC_023209.1	80.2	894	102	31	99713	100584	14355	13515	2e-170	601
MW553042.1	NC_023209.1	74.53	750	153	30	77962	78690	159882	159150	1e-77	292
NC_023209.1	NC_018041.1	95.51	5636	107	32	446969	452517	251829	257405	0	8872
NC_023209.1	NC_018041.1	97.21	5059	50	34	426538	431530	366903	361870	0	8477
NC_023209.1	NC_018041.1	97.48	4723	65	17	65923	70612	246847	242146	0	8013
NC_023209.1	NC_018041.1	96.78	4687	52	30	75785	80422	1104	5740	0	7727
NC_023209.1	NC_018041.1	96.78	4687	52	31	75785	80422	231116	226480	0	7727
NC_023209.1	NC_018041.1	95.1	4406	95	39	26865	31206	171517	167169	0	6828
NC_023209.1	NC_018041.1	98.31	3727	38	11	331770	335472	153151	156876	0	6510
NC_023209.1	NC_018041.1	98.38	3511	33	8	34275	37768	48054	44551	0	6146
NC_023209.1	NC_018041.1	95.63	3641	52	31	320300	323902	357904	354333	0	5744
NC_023209.1	NC_018041.1	96.42	3104	48	16	286042	289104	319749	322830	0	5059
NC_023209.1	NC_018041.1	97.15	2945	38	7	5764	8680	112649	115575	0	4931
NC_023209.1	NC_018041.1	97.05	2777	46	10	323905	326666	354298	351543	0	4641
NC_023209.1	NC_018041.1	96.65	2772	55	10	471955	474710	475505	472756	0	4569
NC_023209.1	NC_018041.1	92.19	3341	69	51	86720	89935	446717	443444	0	4547
NC_023209.1	NC_018041.1	93.23	2967	48	39	62933	65833	249718	246839	0	4224
NC_023209.1	NC_018041.1	93.95	2810	74	26	170935	173707	397498	394748	0	4159
NC_023209.1	NC_018041.1	95.18	2326	49	20	484075	486352	72119	74429	0	3616
NC_023209.1	NC_018041.1	97.77	2111	10	9	106321	108401	462673	464776	0	3603
NC_023209.1	NC_018041.1	95.57	1828	43	9	490504	492316	195500	197304	0	2892
NC_023209.1	NC_018041.1	98.14	1558	27	2	101528	103084	30267	28711	0	2715
NC_023209.1	NC_018041.1	97	1599	22	2	272437	274031	60236	58660	0	2663
NC_023209.1	NC_018041.1	95.55	1685	33	6	168151	169802	400482	398807	0	2658
NC_023209.1	NC_018041.1	95.55	1685	33	6	168151	169802	487415	485740	0	2658
NC_023209.1	NC_018041.1	94.07	1635	29	18	60998	62593	251452	249847	0	2420
NC_023209.1	NC_018041.1	95.07	1541	50	7	155804	157334	307610	306086	0	2401
NC_023209.1	NC_018041.1	97.49	1277	16	6	291756	293022	375517	374247	0	2167
NC_023209.1	NC_018041.1	96.01	1352	15	8	192918	194230	87730	86379	0	2161
NC_023209.1	NC_018041.1	95.41	1308	33	10	19213	20493	142726	144033	0	2058
NC_023209.1	NC_018041.1	93.6	1359	24	10	411749	413050	146386	145034	0	1969
NC_023209.1	NC_018041.1	96.4	1194	17	6	318970	320153	359072	357895	0	1943
NC_023209.1	NC_018041.1	95.5	1221	20	9	404067	405275	522933	521736	0	1917
NC_023209.1	NC_018041.1	95.84	1202	17	7	178315	179508	36059	34883	0	1912
NC_023209.1	NC_018041.1	89.49	1561	62	30	42877	44373	306025	304503	0	1881
NC_023209.1	NC_018041.1	99.9	977	1	0	308280	309256	463800	464776	0	1799
NC_023209.1	NC_018041.1	95.1	1143	21	13	169841	170965	398801	397676	0	1768
NC_023209.1	NC_018041.1	95.1	1143	21	13	169841	170965	485734	484609	0	1768
NC_023209.1	NC_018041.1	94.84	1065	33	6	24314	25361	119710	120769	0	1642
NC_023209.1	NC_018041.1	95.14	1050	20	10	205494	206513	136435	135387	0	1628
NC_023209.1	NC_018041.1	99.44	893	5	0	345162	346054	312089	311197	0	1622
NC_023209.1	NC_018041.1	99.21	887	6	1	9106	9992	115587	116472	0	1598
NC_023209.1	NC_018041.1	93.48	1089	22	17	326710	327766	295741	294670	0	1572
NC_023209.1	NC_018041.1	94.95	1010	32	9	274027	275025	58446	57445	0	1565
NC_023209.1	NC_018041.1	93.37	1071	27	13	170935	171995	484431	483395	0	1544
NC_023209.1	NC_018041.1	95.76	968	14	12	126802	127768	312801	313742	0	1535
NC_023209.1	NC_018041.1	91.36	1146	32	16	190223	191322	518867	519991	0	1506
NC_023209.1	NC_018041.1	92.58	1078	17	17	458669	459714	122319	121273	0	1489
NC_023209.1	NC_018041.1	98.26	806	10	1	49480	50285	202449	201648	0	1408
NC_023209.1	NC_018041.1	91.52	1061	24	13	233654	234661	234924	233877	0	1400
NC_023209.1	NC_018041.1	95.39	867	28	5	138505	139368	407384	408241	0	1369
NC_023209.1	NC_018041.1	99.04	727	7	0	343456	344182	312834	312108	0	1304
NC_023209.1	NC_018041.1	98.24	740	12	1	204708	205446	137189	136450	0	1293
NC_023209.1	NC_018041.1	97	767	16	2	431787	432546	361885	361119	0	1282
NC_023209.1	NC_018041.1	94.2	827	26	9	75201	76015	481876	482692	0	1242
NC_023209.1	NC_018041.1	99.7	672	2	0	179553	180224	34868	34197	0	1230
NC_023209.1	NC_018041.1	96.9	710	16	2	266955	267663	257977	258681	0	1184
NC_023209.1	NC_018041.1	92.88	800	20	14	432802	433587	361080	360304	0	1127
NC_023209.1	NC_018041.1	96.87	671	15	3	394787	395457	427090	426426	0	1118
NC_023209.1	NC_018041.1	95.49	709	11	3	143692	144379	406373	407081	0	1112
NC_023209.1	NC_018041.1	94.61	687	14	7	453262	453942	61329	61998	0	1042
NC_023209.1	NC_018041.1	90.97	764	63	5	383296	384056	286500	285740	0	1024
NC_023209.1	NC_018041.1	95.42	633	28	1	211452	212083	98700	98068	0	1007
NC_023209.1	NC_018041.1	96.24	611	12	4	489032	489637	511885	511281	0	990
NC_023209.1	NC_018041.1	95.25	631	15	3	72732	73347	241773	241143	0	985
NC_023209.1	NC_018041.1	93.99	632	27	9	163466	164091	184263	183637	0	946
NC_023209.1	NC_018041.1	91.77	656	16	8	329650	330274	292860	292212	0	878
NC_023209.1	NC_018041.1	74.43	751	152	31	159150	159882	464420	463692	8e-76	287

## Sheet: Table S8
Table S8. Homologous DNA fragments between the L. japonicus mitochondrial and plastid genomes.
Number	mitogenome	% Identity	Alignment Length	Mismatches	Gap Openings	Alignment start (plastome)	Alignment end (plastome)	Alignment start (mitogenome)	Alignment end (mitogenome)	E-value	Bit Score	MTPT annotation
MTPT1	mtDNA	99.96	5609	1	1	100150	105758	222155	227762	0	10346	complete rrn23 exon
MTPT2	mtDNA	99.96	5609	1	1	134223	128615	222155	227762	0	10346
MTPT3	mtDNA	99.91	1086	0	1	54364	55449	85224	86308	0	1999	partial rbcL
MTPT4	mtDNA	100	779	0	0	40463	41241	344609	345387	0	1439
MTPT5	mtDNA	100	773	0	0	84122	84894	1	773	0	1428	partial rpl2 exon
MTPT6	mtDNA	100	773	0	0	150251	149479	1	773	0	1428
MTPT7	mtDNA	99.46	739	4	0	24470	23732	195589	196327	0	1343
MTPT8	mtDNA	99.84	625	0	1	84751	85374	383575	384199	0	1147	partial ycf2
MTPT9	mtDNA	99.84	625	0	1	149622	148999	383575	384199	0	1147
MTPT10	mtDNA	100	486	0	0	81746	81261	274792	275277	0	898
MTPT11	mtDNA	100	403	0	0	87562	87160	293532	293934	0	745
MTPT12	mtDNA	100	403	0	0	146811	147213	293532	293934	0	745
MTPT13	mtDNA	95.51	445	6	7	65438	65878	382433	382867	0	699	complete trnP-UGG
MTPT14	mtDNA	95.83	432	1	2	98122	97707	32378	32808	0	682
MTPT15	mtDNA	95.83	432	1	2	136251	136666	32378	32808	0	682
MTPT16	mtDNA	80.45	880	126	35	99781	98918	72012	72861	7e-180	630
MTPT17	mtDNA	80.45	880	126	35	134592	135455	72012	72861	7e-180	630
MTPT18	mtDNA	80.23	880	128	35	98918	99781	107146	107995	2e-176	619
MTPT19	mtDNA	80.23	880	128	35	135455	134592	107146	107995	2e-176	619
MTPT20	mtDNA	100	226	0	0	80363	80138	92845	93070	6e-116	418
MTPT21	mtDNA	100	221	0	0	13610	13390	27144	27364	4e-113	409
MTPT22	mtDNA	98.49	199	0	2	20170	19973	199459	199655	8e-95	348
MTPT23	mtDNA	100	185	0	0	21671	21855	15904	16088	4e-93	342
MTPT24	mtDNA	76.42	441	70	21	104687	104262	36618	37039	1e-52	207
MTPT25	mtDNA	76.42	441	70	21	129686	130111	36618	37039	1e-52	207
MTPT26	mtDNA	90.35	114	4	3	30298	30185	263945	264051	4e-33	143
MTPT27	mtDNA	97.47	79	2	0	79	1	90351	90429	7e-31	135
MTPT28	mtDNA	93.67	79	5	0	51553	51475	255222	255300	7e-26	119
MTPT29	mtDNA	97.06	34	0	1	22277	22309	111940	111973	6e-07	56.5
MTPT30	mtDNA	100	30	0	0	102823	102852	341364	341393	6e-07	56.5
MTPT31	mtDNA	100	30	0	0	131550	131521	341364	341393	6e-07	56.5

## Sheet: Table S9
TABLE S9. Homologous fragments between organellar genomes and nuclear chromosomes of L. japonicus.
Chromosome Name	Chromosome Length (bp)	Length of Plastome–Chromosome Homologous Fragments (bp)	Proportion of Plastome Homology to Chromosome (%)	Proportion of Plastome Homology to Plastome (%)	Length of Mitogenome–Chromosome Homologous Fragments (bp)	Proportion of Mitogenome Homology to Chromosome (%)	Proportion of Mitogenome Homology to Mitogenome (%)
CM061052.1	53664944	75458	0.0014	0.4976	119639	0.0022	0.3114
CM061053.1	52970626	6120	0.0001	0.0404	38271	0.0007	0.0996
CM061054.1	51899426	16821	0.0003	0.1109	35575	0.0007	0.0926
CM061055.1	50856816	27542	0.0005	0.1816	38791	0.0008	0.101
CM061056.1	51216301	17579	0.0003	0.1159	39485	0.0008	0.1028
CM061057.1	49257618	26959	0.0005	0.1778	37455	0.0008	0.0975
CM061058.1	48858011	31640	0.0006	0.2087	91865	0.0019	0.2391
CM061059.1	44578194	21775	0.0005	0.1436	57783	0.0013	0.1504
CM061060.1	42478245	223652	0.0053	1.475	54912	0.0013	0.1429
CM061061.1	40076341	9879	0.0002	0.0652	23120	0.0006	0.0602
Total	485856522	457425	0.0009		536896	0.0011

## Sheet: Table S10
Table S10. Detailed coordinates of homologous fragments between organelle genomes and nuclear chromosomes in L. japonicus.
Organelle Source	Chromosome Name	Alignment Length (bp)	Start Position (Organelle Genome)	End Position (Organelle Genome)	Start Position (Nuclear Genome)	End Position (Nuclear Genome)	Gene Type	Completeness	Gene Name
plastome	CM061052.1	6420	45264	51660	31012654	31006308	CDS	complete	ndhC
plastome	CM061052.1	16177	12340	28460	30991328	30975306	CDS	complete	rpoB
plastome	CM061052.1	1326	91299	92617	10109382	10110696	CDS	complete	ycf15
plastome	CM061052.1	2903	89429	92319	30994180	30991325	CDS	complete	ycf15
plastome	CM061052.1	1948	130912	132850	10112706	10110777	tRNA	complete	trnA-UGC
plastome	CM061052.1	1948	101523	103461	10110777	10112706	tRNA	complete	trnA-UGC
plastome	CM061052.1	3167	99812	102961	30974791	30971677	tRNA	complete	trnA-UGC
plastome	CM061052.1	3167	131412	134561	30971677	30974791	tRNA	complete	trnI-GAU
plastome	CM061052.1	267	65671	65937	6258136	6257874	tRNA	complete	trnP-UGG
plastome	CM061053.1	173	84777	84949	13615458	13615286	tRNA	complete	trnI-CAU
plastome	CM061053.1	173	149424	149596	13615286	13615458	tRNA	complete	trnI-CAU
plastome	CM061053.1	249	65752	66000	14407572	14407324	tRNA	complete	trnP-UGG
plastome	CM061055.1	9517	25951	35450	17725901	17716420	CDS	complete	psbC
plastome	CM061055.1	398	127138	127535	10644610	10644214	tRNA	complete	trnN-GUU
plastome	CM061055.1	398	106838	107235	10644214	10644610	tRNA	complete	trnN-GUU
plastome	CM061055.1	278	128018	128295	22399898	22399621	tRNA	complete	trnR-ACG
plastome	CM061055.1	278	106078	106355	22399621	22399898	tRNA	complete	trnR-ACG
plastome	CM061056.1	3486	55788	59261	48197396	48200829	CDS	complete	psaI
plastome	CM061057.1	10755	117036	127713	42313143	42323822	CDS	complete	ycf1
plastome	CM061058.1	3828	31514	35320	10414033	10410235	CDS	complete	psbC
plastome	CM061059.1	5164	53430	58576	24434600	24429451	CDS	complete	accD
plastome	CM061059.1	743	30986	31728	2225176	2225918	tRNA	complete	trnT-GGU
plastome	CM061060.1	3382	55065	58436	34763258	34766613	CDS	complete	accD
plastome	CM061060.1	20453	58419	78779	34778687	34798767	CDS	complete	infA
plastome	CM061060.1	1371	77421	78779	34760808	34759448	CDS	complete	infA
plastome	CM061060.1	802	77979	78779	34848511	34849308	CDS	complete	infA
plastome	CM061060.1	20656	58132	78779	34828686	34808177	CDS	complete	infA
plastome	CM061060.1	4092	1	4079	34684075	34680029	CDS	complete	matK
plastome	CM061060.1	5143	146510	151630	34750309	34755399	CDS	complete	rpl2
plastome	CM061060.1	3304	148332	151630	34856745	34853478	CDS	complete	rpl2
plastome	CM061060.1	8161	143500	151630	10337666	10329607	CDS	complete	rpl2
plastome	CM061060.1	3627	148013	151630	34687676	34684076	CDS	complete	rpl2
plastome	CM061060.1	2397	149234	151630	34801763	34804144	CDS	complete	rpl2
plastome	CM061060.1	2782	75005	77778	34845641	34848409	CDS	complete	rpoA
plastome	CM061060.1	12497	87859	100322	34748977	34736617	CDS	complete	rps7
plastome	CM061060.1	10211	86386	96572	34687671	34697765	CDS	complete	rps7
plastome	CM061060.1	19742	114127	133812	34697775	34717320	CDS	complete	ycf1
plastome	CM061060.1	2355	89943	92285	34880248	34882587	CDS	complete	ycf15
plastome	CM061061.1	515	142041	142548	13023649	13023139	CDS	complete	ycf15
plastome	CM061061.1	515	91825	92332	13023139	13023649	CDS	complete	ycf15
plastome	CM061052.1	87	57987	58073	10665721	10665806	CDS	partial	accD
plastome	CM061052.1	8544	52165	60675	31006324	30997873	CDS	partial	cemA
plastome	CM061052.1	1879	107939	109811	10114593	10112742	CDS	partial	ndhF
plastome	CM061052.1	109	119588	119695	41586429	41586321	CDS	partial	ndhH
plastome	CM061052.1	106	119590	119695	41591460	41591355	CDS	partial	ndhH
plastome	CM061052.1	109	119584	119692	41598043	41598151	CDS	partial	ndhH
plastome	CM061052.1	41	59847	59887	46852642	46852682	CDS	partial	pafII
plastome	CM061052.1	175	115130	115304	17714622	17714795	CDS	partial	psaC
plastome	CM061052.1	47	63551	63597	41232399	41232353	CDS	partial	psbL
plastome	CM061052.1	180	81805	81983	30706440	30706618	CDS	partial	rpl22
plastome	CM061052.1	370	84582	84951	753689	753321	CDS	partial	rpl23
plastome	CM061052.1	370	149422	149791	753321	753689	CDS	partial	rpl23
plastome	CM061052.1	98	67045	67142	30705478	30705383	CDS	partial	rps18
plastome	CM061052.1	42	67320	67361	47606115	47606074	CDS	partial	rps18
plastome	CM061052.1	208	45093	45300	6258348	6258141	CDS	partial	rps4
plastome	CM061052.1	211	45091	45301	6603871	6604080	CDS	partial	rps4
plastome	CM061052.1	432	138529	138960	26363763	26363336	CDS	partial	rps7
plastome	CM061052.1	432	95413	95844	26363336	26363763	CDS	partial	rps7
plastome	CM061052.1	1326	141756	143074	10110696	10109382	CDS	partial	ycf2
plastome	CM061052.1	2903	142054	144944	30991325	30994180	CDS	partial	ycf2
plastome	CM061052.1	133	35951	36083	17714921	17714790	tRNA	partial	trnG-GCC
plastome	CM061053.1	558	32230	32785	42444718	42444173	CDS	partial	psbD
plastome	CM061053.1	120	32375	32494	46177742	46177623	CDS	partial	psbD
plastome	CM061053.1	162	76654	76815	17811856	17811696	CDS	partial	rpoA
plastome	CM061053.1	103	120866	120968	11138943	11138844	CDS	partial	rps15
plastome	CM061053.1	357	15057	15412	51375593	51375946	CDS	partial	rps2
plastome	CM061054.1	7955	2332	10265	12246924	12239046	CDS	partial	atpA
plastome	CM061054.1	2295	11	2297	12248097	12250355	CDS	partial	matK
plastome	CM061054.1	262	59310	59567	5499999	5499738	CDS	partial	pafII
plastome	CM061054.1	283	54330	54609	23507695	23507416	CDS	partial	rbcL
plastome	CM061054.1	284	54324	54607	19100655	19100937	CDS	partial	rbcL
plastome	CM061054.1	103	66897	66999	23828680	23828578	CDS	partial	rpl33
plastome	CM061054.1	205	26548	26752	21269720	21269922	CDS	partial	rpoB
plastome	CM061054.1	111	50566	50676	12903823	12903933	tRNA	partial	trnV-UAC
plastome	CM061055.1	62	58033	58094	10459733	10459794	CDS	partial	accD
plastome	CM061055.1	363	57832	58194	6985891	6985529	CDS	partial	accD
plastome	CM061055.1	887	112339	113224	22400784	22399901	CDS	partial	ccsA
plastome	CM061055.1	383	110564	110946	10642739	10642357	CDS	partial	ndhF
plastome	CM061055.1	126	59205	59330	10644088	10644213	CDS	partial	pafII
plastome	CM061055.1	60	73600	73659	10640861	10640920	CDS	partial	psbH
plastome	CM061055.1	2215	78776	80981	39179889	39182091	CDS	partial	rpl16
plastome	CM061055.1	137	81084	81220	39182126	39182262	CDS	partial	rpl16
plastome	CM061055.1	255	151379	151630	39184359	39184106	CDS	partial	rpl2
plastome	CM061055.1	1915	81084	82994	39182457	39184359	CDS	partial	rpl2
plastome	CM061055.1	616	82394	83009	41620333	41620944	CDS	partial	rpl2
plastome	CM061055.1	267	151364	151630	41620944	41620678	CDS	partial	rpl2
plastome	CM061055.1	407	81973	82375	41619854	41620259	CDS	partial	rpl22
plastome	CM061055.1	145	149685	149829	8937944	8937800	CDS	partial	rpl23
plastome	CM061055.1	145	84544	84688	8937800	8937944	CDS	partial	rpl23
plastome	CM061055.1	1678	19447	21124	26591069	26592744	CDS	partial	rpoC1
plastome	CM061055.1	72	81296	81367	15937110	15937039	CDS	partial	rps3
plastome	CM061055.1	167	81301	81467	15937365	15937199	CDS	partial	rps3
plastome	CM061055.1	239	65805	66043	42712140	42711904	tRNA	partial	trnP-UGG
plastome	CM061056.1	60	9999	10058	14050614	14050673	CDS	partial	atpA
plastome	CM061056.1	200	52077	52276	1702467	1702268	CDS	partial	atpB
plastome	CM061056.1	1379	59306	60678	48200826	48202184	CDS	partial	cemA
plastome	CM061056.1	831	140811	141638	41746264	41745443	CDS	partial	ndhB
plastome	CM061056.1	831	92735	93562	41745443	41746264	CDS	partial	ndhB
plastome	CM061056.1	270	149538	149807	7152544	7152276	CDS	partial	rpl23
plastome	CM061056.1	270	84566	84835	7152276	7152544	CDS	partial	rpl23
plastome	CM061056.1	154	6184	6335	45847451	45847604	CDS	partial	rps16
plastome	CM061056.1	134	142240	142373	45848134	45848002	CDS	partial	ycf15
plastome	CM061056.1	134	92000	92133	45848002	45848134	CDS	partial	ycf15
plastome	CM061056.1	207	101354	101559	45844583	45844381	tRNA	partial	trnA-UGC
plastome	CM061056.1	207	132814	133019	45844381	45844583	tRNA	partial	trnI-GAU
plastome	CM061057.1	172	112052	112223	46205561	46205390	CDS	partial	ccsA
plastome	CM061057.1	7470	106628	114069	42313143	42305685	CDS	partial	ndhD
plastome	CM061057.1	1720	106660	108376	42323822	42322105	CDS	partial	ndhF
plastome	CM061057.1	97	81316	81412	22660151	22660055	CDS	partial	rps3
plastome	CM061057.1	124	79185	79308	40325913	40326036	CDS	partial	rps8
plastome	CM061057.1	1751	125997	127745	42311394	42313143	CDS	partial	ycf1
plastome	CM061058.1	68	51734	51801	9730024	9730089	CDS	partial	atpE
plastome	CM061058.1	103	117434	117536	33644296	33644397	CDS	partial	ndhA
plastome	CM061058.1	1479	119289	120753	32653273	32651810	CDS	partial	ndhH
plastome	CM061058.1	231	28725	28955	20026956	20027186	CDS	partial	petN
plastome	CM061058.1	117	73572	73687	6268186	6268071	CDS	partial	psbH
plastome	CM061058.1	37	29554	29590	36484772	36484808	CDS	partial	psbM
plastome	CM061058.1	205	110917	111117	38523897	38523695	CDS	partial	rpl32
plastome	CM061058.1	110	66862	66971	42563974	42563865	CDS	partial	rpl33
plastome	CM061058.1	15213	7035	22209	32270857	32255796	CDS	partial	rpoC1
plastome	CM061058.1	433	81296	81728	11735338	11734909	CDS	partial	rps3
plastome	CM061058.1	1081	120746	121819	32651118	32650051	CDS	partial	ycf1
plastome	CM061058.1	1532	90574	92098	11706427	11707946	CDS	partial	ycf15
plastome	CM061058.1	1532	142275	143799	11707946	11706427	CDS	partial	ycf2
plastome	CM061058.1	40	128803	128842	2421938	2421899	rRNA	partial	rrn4.5
plastome	CM061058.1	40	105531	105570	2421899	2421938	rRNA	partial	rrn4.5
plastome	CM061058.1	40	106934	106973	27301845	27301806	tRNA	partial	trnN-GUU
plastome	CM061058.1	40	127400	127439	27301806	27301845	tRNA	partial	trnN-GUU
plastome	CM061058.1	134	6971	7104	15223911	15223778	tRNA	partial	trnQ-UUG
plastome	CM061059.1	395	9733	10127	30983374	30983768	CDS	partial	atpA
plastome	CM061059.1	222	14922	15143	27721617	27721838	CDS	partial	atpI
plastome	CM061059.1	300	92823	93122	7240947	7240648	CDS	partial	ndhB
plastome	CM061059.1	300	141251	141550	7240648	7240947	CDS	partial	ndhB
plastome	CM061059.1	298	92825	93122	7283839	7283542	CDS	partial	ndhB
plastome	CM061059.1	298	141251	141548	7283542	7283839	CDS	partial	ndhB
plastome	CM061059.1	1322	70778	72099	24441948	24440629	CDS	partial	psbB
plastome	CM061059.1	277	63876	64152	7240462	7240186	CDS	partial	psbE
plastome	CM061059.1	83	76690	76771	29457262	29457180	CDS	partial	rpoA
plastome	CM061059.1	140	16280	16419	44275995	44276133	CDS	partial	rpoC2
plastome	CM061059.1	110	77770	77879	15161137	15161028	CDS	partial	rps11
plastome	CM061059.1	207	138845	139051	7284731	7284526	CDS	partial	rps7
plastome	CM061059.1	207	95322	95528	7284526	7284731	CDS	partial	rps7
plastome	CM061059.1	207	138845	139051	7241835	7241630	CDS	partial	rps7
plastome	CM061059.1	207	95322	95528	7241630	7241835	CDS	partial	rps7
plastome	CM061059.1	58	149369	149426	15161194	15161137	CDS	partial	ycf2
plastome	CM061059.1	58	84947	85004	15161137	15161194	CDS	partial	ycf2
plastome	CM061059.1	125	8837	8960	13724283	13724159	tRNA	partial	trnG-UCC
plastome	CM061059.1	143	44190	44332	29477344	29477486	tRNA	partial	trnS-GGA
plastome	CM061059.1	145	44190	44332	29457299	29457443	tRNA	partial	trnS-GGA
plastome	CM061060.1	175	1829	2003	8408162	8407989	CDS	partial	matK
plastome	CM061060.1	324	117403	117723	40853038	40853360	CDS	partial	ndhA
plastome	CM061060.1	7847	100561	108376	34717320	34709554	CDS	partial	ndhF
plastome	CM061060.1	3465	71546	74998	34842162	34845597	CDS	partial	petB
plastome	CM061060.1	1230	1	1229	10329606	10328387	CDS	partial	psbA
plastome	CM061060.1	13605	57958	71521	34828683	34842177	CDS	partial	psbB
plastome	CM061060.1	2440	52441	54872	34760806	34763218	CDS	partial	rbcL
plastome	CM061060.1	424	121044	121466	12573510	12573921	CDS	partial	rps15
plastome	CM061060.1	3822	78776	82579	34849397	34853186	CDS	partial	rps19
plastome	CM061060.1	92	91782	91873	2141277	2141186	CDS	partial	ycf15
plastome	CM061060.1	2355	142088	144430	34882587	34880248	CDS	partial	ycf2
plastome	CM061060.1	12497	134051	146514	34736617	34748977	CDS	partial	ycf2
plastome	CM061060.1	10211	137801	147987	34697765	34687671	CDS	partial	ycf2
plastome	CM061060.1	9133	78776	87863	34759355	34750309	CDS	partial	ycf2
plastome	CM061060.1	8161	82743	90873	10329607	10337666	CDS	partial	ycf2
plastome	CM061060.1	3450	82598	86041	34853333	34856745	CDS	partial	ycf2
plastome	CM061060.1	3627	82743	86360	34684076	34687676	CDS	partial	ycf2
plastome	CM061060.1	6370	78776	85139	34808090	34801763	CDS	partial	ycf2
plastome	CM061060.1	92	142500	142591	2141186	2141277	CDS	partial	ycf2
plastome	CM061060.1	304	105095	105397	11980429	11980126	rRNA	partial	rrn23
plastome	CM061060.1	304	128976	129278	11980126	11980429	rRNA	partial	rrn23
plastome	CM061060.1	42	128693	128734	32125644	32125685	rRNA	partial	rrn4.5
plastome	CM061060.1	36	84778	84813	648467	648432	tRNA	partial	trnI-CAU
plastome	CM061060.1	36	149560	149595	648432	648467	tRNA	partial	trnI-CAU
plastome	CM061061.1	1672	108286	109951	13022966	13021313	CDS	partial	ndhF
plastome	CM061061.1	51	120772	120821	18354127	18354177	CDS	partial	ndhH
plastome	CM061061.1	225	7208	7432	18094538	18094759	CDS	partial	psbK
plastome	CM061061.1	194	82433	82626	19485914	19486106	CDS	partial	rps19
mitogenome	CM061052.1	15147	285052	300129	23958173	23973145	CDS	complete	atp8
mitogenome	CM061052.1	6677	207708	214348	24008413	24001804	CDS	complete	nad5
mitogenome	CM061052.1	286	32378	32663	10098531	10098798	CDS	complete	orf116a
mitogenome	CM061052.1	6062	102651	108685	24014388	24008418	rRNA	complete	rrn18
mitogenome	CM061052.1	2826	222155	224966	30974458	30971677	tRNA	complete	trnI-GAU
mitogenome	CM061052.1	1163	222155	223313	10096519	10095374	tRNA	complete	trnI-GAU
mitogenome	CM061052.1	515	222327	222840	6758595	6759100	tRNA	complete	trnI-GAU
mitogenome	CM061052.1	521	222326	222843	6367840	6368341	tRNA	complete	trnI-GAU
mitogenome	CM061052.1	522	222326	222843	6263998	6263504	tRNA	complete	trnI-GAU
mitogenome	CM061052.1	2603	253262	255849	29539093	29541669	tRNA	complete	trnM-CAU
mitogenome	CM061052.1	79	255222	255300	31006415	31006493	tRNA	complete	trnM-CAU
mitogenome	CM061052.1	238	382686	382921	6258112	6257880	tRNA	complete	trnP-UGG
mitogenome	CM061052.1	182	382686	382867	6373660	6373838	tRNA	complete	trnP-UGG
mitogenome	CM061052.1	245	382683	382924	6829507	6829744	tRNA	complete	trnP-UGG
mitogenome	CM061052.1	185	382685	382867	6604109	6604289	tRNA	complete	trnP-UGG
mitogenome	CM061052.1	778	355211	355986	30706618	30707385	tRNA	complete	trnY-GUA
mitogenome	CM061053.1	172	227823	227993	26749729	26749558	tRNA	complete	trnK-UUU
mitogenome	CM061053.1	183	382741	382921	14407572	14407393	tRNA	complete	trnP-UGG
mitogenome	CM061054.1	838	48372	49203	28228147	28227317	tRNA	complete	trnC-ACA
mitogenome	CM061054.1	429	222381	222808	50508082	50508492	tRNA	complete	trnI-GAU
mitogenome	CM061055.1	4099	77581	81679	39460091	39456001	CDS	complete	orf107d
mitogenome	CM061055.1	114	263945	264051	17721570	17721683	tRNA	complete	trnD-GUC
mitogenome	CM061056.1	2908	296429	299327	44064018	44061143	CDS	complete	atp8
mitogenome	CM061056.1	1860	129112	130964	46972403	46970576	CDS	complete	rps10
mitogenome	CM061057.1	187	78583	78768	47477144	47477314	CDS	complete	orf107d
mitogenome	CM061057.1	396	42054	42449	27467988	27467593	tRNA	complete	trnE-UUC
mitogenome	CM061058.1	1855	308547	310390	11709779	11707967	CDS	complete	atp1
mitogenome	CM061058.1	5039	184095	189122	11681442	11686418	CDS	complete	orf182a
mitogenome	CM061058.1	10490	354170	364632	11700759	11690377	tRNA	complete	trnY-GUA
mitogenome	CM061059.1	2078	104714	106791	17958486	17956410	CDS	complete	orf137
mitogenome	CM061060.1	1496	334980	336453	37285087	37286571	CDS	complete	nad1
mitogenome	CM061060.1	433	32378	32808	34738788	34739202	CDS	complete	orf116a
mitogenome	CM061060.1	773	1	773	34802776	34802007	CDS	complete	rpl23
mitogenome	CM061060.1	775	1	773	34685448	34686220	CDS	complete	rpl23
mitogenome	CM061060.1	776	1	773	34754027	34753255	CDS	complete	rpl23
mitogenome	CM061060.1	775	1	773	10330976	10331747	CDS	complete	rpl23
mitogenome	CM061060.1	774	1	773	34854842	34855609	CDS	complete	rpl23
mitogenome	CM061060.1	162	71155	71316	8269126	8268965	rRNA	complete	rrn5
mitogenome	CM061060.1	83	90350	90431	10329527	10329608	tRNA	complete	trnH-GUG
mitogenome	CM061060.1	445	382433	382867	34821420	34820980	tRNA	complete	trnP-UGG
mitogenome	CM061060.1	444	382433	382867	34836140	34836576	tRNA	complete	trnP-UGG
mitogenome	CM061060.1	445	382433	382867	34785666	34786102	tRNA	complete	trnP-UGG
mitogenome	CM061061.1	137	139783	139919	34546215	34546083	CDS	complete	rps19
mitogenome	CM061052.1	376	308529	308903	29535340	29534972	CDS	partial	atp1
mitogenome	CM061052.1	90	125111	125200	30072905	30072818	CDS	partial	atp9
mitogenome	CM061052.1	87	122833	122917	37336242	37336327	CDS	partial	cob
mitogenome	CM061052.1	376	218441	218815	29535340	29534972	CDS	partial	orf115a
mitogenome	CM061052.1	97	240087	240183	10665624	10665718	CDS	partial	orf122c
mitogenome	CM061052.1	135	105488	105621	42674308	42674441	CDS	partial	orf137
mitogenome	CM061052.1	1095	85224	86308	31004146	31003058	CDS	partial	rbcL
mitogenome	CM061052.1	313	461	773	753689	753378	CDS	partial	rpl23
mitogenome	CM061052.1	246	130713	130958	44226148	44225904	CDS	partial	rps10
mitogenome	CM061052.1	1948	223528	225466	10110777	10112706	rRNA	partial	rrn26
mitogenome	CM061052.1	1526	226251	227762	10118104	10116625	rRNA	partial	rrn26
mitogenome	CM061052.1	49	71155	71202	32512565	32512613	rRNA	partial	rrn5
mitogenome	CM061052.1	43	71155	71197	32663402	32663444	rRNA	partial	rrn5
mitogenome	CM061052.1	48	71155	71202	32579687	32579734	rRNA	partial	rrn5
mitogenome	CM061052.1	49	71155	71202	32740270	32740318	rRNA	partial	rrn5
mitogenome	CM061052.1	48	71155	71202	32824416	32824463	rRNA	partial	rrn5
mitogenome	CM061052.1	44	71155	71198	32406303	32406346	rRNA	partial	rrn5
mitogenome	CM061052.1	47	71156	71202	32540849	32540895	rRNA	partial	rrn5
mitogenome	CM061052.1	44	71155	71197	32630677	32630720	rRNA	partial	rrn5
mitogenome	CM061052.1	68	90377	90442	40733532	40733599	tRNA	partial	trnH-GUG
mitogenome	CM061052.1	258	255244	255500	14174896	14175149	tRNA	partial	trnM-CAU
mitogenome	CM061053.1	233	298260	298491	25163040	25163268	CDS	partial	atp8
mitogenome	CM061053.1	340	238954	239290	18412417	18412086	CDS	partial	ccmB
mitogenome	CM061053.1	176	347930	348104	52766705	52766532	CDS	partial	ccmFN
mitogenome	CM061053.1	502	335778	336275	44341628	44342125	CDS	partial	nad1
mitogenome	CM061053.1	928	362564	363487	50102778	50101860	CDS	partial	nad4
mitogenome	CM061053.1	236	212816	213050	52202873	52203100	CDS	partial	nad5
mitogenome	CM061053.1	36	166929	166964	41637066	41637101	CDS	partial	nad7
mitogenome	CM061053.1	839	345083	345917	8293242	8294050	CDS	partial	orf149
mitogenome	CM061053.1	85	346042	346125	40840314	40840231	CDS	partial	orf149
mitogenome	CM061053.1	175	184243	184409	6947450	6947622	CDS	partial	orf182b
mitogenome	CM061053.1	426	355	773	12658432	12658019	CDS	partial	rpl23
mitogenome	CM061053.1	98	296743	296840	8006340	8006437	CDS	partial	sdh4
mitogenome	CM061054.1	260	210406	210664	21682828	21683082	CDS	partial	nad5
mitogenome	CM061054.1	240	221393	221631	21993934	21994172	CDS	partial	nad6
mitogenome	CM061054.1	114	221553	221665	11794670	11794780	CDS	partial	nad6
mitogenome	CM061054.1	64	221562	221625	8340321	8340258	CDS	partial	nad6
mitogenome	CM061054.1	344	50277	50620	39699296	39698956	CDS	partial	orf104a
mitogenome	CM061054.1	120	218313	218420	45900505	45900624	CDS	partial	orf115a
mitogenome	CM061054.1	244	85224	85467	19100695	19100937	CDS	partial	rbcL
mitogenome	CM061054.1	249	85224	85469	23507661	23507416	CDS	partial	rbcL
mitogenome	CM061054.1	203	327700	327902	37003855	37004057	CDS	partial	rpl16
mitogenome	CM061054.1	198	498	690	47241933	47242130	CDS	partial	rpl23
mitogenome	CM061054.1	204	129862	130064	30175057	30175257	CDS	partial	rps10
mitogenome	CM061054.1	85	297077	297161	50871836	50871919	CDS	partial	sdh4
mitogenome	CM061054.1	746	106525	107265	51864819	51865555	rRNA	partial	rrn18
mitogenome	CM061054.1	312	227372	227681	142880	142581	rRNA	partial	rrn26
mitogenome	CM061054.1	89	71256	71343	27923539	27923625	rRNA	partial	rrn5
mitogenome	CM061054.1	71	90350	90419	12248166	12248097	tRNA	partial	trnH-GUG
mitogenome	CM061055.1	76	125374	125449	19833054	19833129	CDS	partial	atp9
mitogenome	CM061055.1	70	123987	124056	1050784	1050853	CDS	partial	cob
mitogenome	CM061055.1	127	152630	152751	7982853	7982978	CDS	partial	cox2
mitogenome	CM061055.1	243	75638	75880	34215832	34216065	CDS	partial	nad3
mitogenome	CM061055.1	148	345519	345666	39906076	39905932	CDS	partial	orf149
mitogenome	CM061055.1	259	1	259	3158535	3158783	CDS	partial	rpl23
mitogenome	CM061055.1	145	423	567	8937800	8937944	CDS	partial	rpl23
mitogenome	CM061055.1	351	330880	331229	30704917	30704574	CDS	partial	rps3
mitogenome	CM061055.1	108	331552	331659	1050347	1050454	CDS	partial	rps4
mitogenome	CM061055.1	90	42255	42344	26284936	26284847	tRNA	partial	trnE-UUC
mitogenome	CM061055.1	101	227946	228045	31804284	31804184	tRNA	partial	trnK-UUU
mitogenome	CM061055.1	203	255284	255486	8839934	8839732	tRNA	partial	trnM-CAU
mitogenome	CM061055.1	130	382794	382921	42712140	42712016	tRNA	partial	trnP-UGG
mitogenome	CM061056.1	459	146554	147000	35427148	35427592	CDS	partial	cox2
mitogenome	CM061056.1	312	374619	374925	27598878	27598571	CDS	partial	matR
mitogenome	CM061056.1	2578	370843	373411	46972399	46974944	CDS	partial	nad4
mitogenome	CM061056.1	174	362662	362835	22089516	22089687	CDS	partial	nad4
mitogenome	CM061056.1	106	259398	259503	45845085	45844982	CDS	partial	nad4L
mitogenome	CM061056.1	582	166161	166740	46034447	46033870	CDS	partial	nad9
mitogenome	CM061056.1	625	105454	106078	34843374	34842753	CDS	partial	orf137
mitogenome	CM061056.1	55	187399	187453	1127438	1127490	CDS	partial	orf182a
mitogenome	CM061056.1	38	327750	327787	16289416	16289379	CDS	partial	rpl16
mitogenome	CM061056.1	270	445	714	7152276	7152544	CDS	partial	rpl23
mitogenome	CM061056.1	164	130808	130971	26402970	26403133	CDS	partial	rps10
mitogenome	CM061056.1	59	42326	42384	46936398	46936340	tRNA	partial	trnE-UUC
mitogenome	CM061057.1	67	166721	166787	14291495	14291561	CDS	partial	nad9
mitogenome	CM061057.1	4913	242884	247796	26157983	26162895	CDS	partial	orf304
mitogenome	CM061057.1	45	331573	331617	48023280	48023324	CDS	partial	rps4
mitogenome	CM061057.1	97	263960	264056	34559088	34559182	tRNA	partial	trnD-GUC
mitogenome	CM061057.1	85	90402	90484	1161241	1161157	tRNA	partial	trnH-GUG
mitogenome	CM061058.1	81	10219	10299	11704737	11704657	CDS	partial	atp6
mitogenome	CM061058.1	1185	296635	297818	11743426	11742253	CDS	partial	cox3
mitogenome	CM061058.1	242	376587	376827	97152	96916	CDS	partial	matR
mitogenome	CM061058.1	215	50326	50539	18836496	18836285	CDS	partial	orf104a
mitogenome	CM061058.1	1410	218459	219858	11709779	11708403	CDS	partial	orf115a
mitogenome	CM061058.1	3090	298423	301506	11740914	11737853	CDS	partial	orf214
mitogenome	CM061058.1	578	85226	85794	3376942	3377514	CDS	partial	rbcL
mitogenome	CM061058.1	298	139141	139438	9597179	9597472	CDS	partial	rpl10
mitogenome	CM061058.1	90	106829	106918	7412104	7412191	rRNA	partial	rrn18
mitogenome	CM061058.1	40	227536	227575	2421899	2421938	rRNA	partial	rrn26
mitogenome	CM061058.1	80	255181	255260	3921415	3921494	tRNA	partial	trnM-CAU
mitogenome	CM061059.1	107	308740	308846	5389887	5389790	CDS	partial	atp1
mitogenome	CM061059.1	2877	346495	349369	38753999	38751130	CDS	partial	ccmFN
mitogenome	CM061059.1	119	146680	146798	15027843	15027725	CDS	partial	cox2
mitogenome	CM061059.1	2572	73216	75787	17956410	17958981	CDS	partial	nad3
mitogenome	CM061059.1	245	50435	50679	7980780	7981023	CDS	partial	orf104a
mitogenome	CM061059.1	87	220552	220638	24278208	24278122	CDS	partial	orf115c
mitogenome	CM061059.1	1093	85224	86308	24433665	24432577	CDS	partial	rbcL
mitogenome	CM061059.1	159	129842	130000	9369782	9369926	CDS	partial	rps10
mitogenome	CM061059.1	59	130860	130918	15461982	15462039	CDS	partial	rps10
mitogenome	CM061059.1	75	296706	296780	43466959	43466885	CDS	partial	sdh4
mitogenome	CM061059.1	342	222523	222863	42845072	42845394	tRNA	partial	trnI-GAU
mitogenome	CM061059.1	168	222508	222675	24198336	24198503	tRNA	partial	trnI-GAU
mitogenome	CM061059.1	105	222394	222498	28166469	28166573	tRNA	partial	trnI-GAU
mitogenome	CM061060.1	108	258937	259044	14581529	14581422	CDS	partial	atp4
mitogenome	CM061060.1	136	298767	298896	10405965	10405830	CDS	partial	atp8
mitogenome	CM061060.1	39	298377	298415	40090992	40091030	CDS	partial	atp8
mitogenome	CM061060.1	259	152635	152893	30182913	30183168	CDS	partial	cox2
mitogenome	CM061060.1	511	85224	85732	34762711	34763218	CDS	partial	rbcL
mitogenome	CM061060.1	880	107146	107995	34738003	34737148	rRNA	partial	rrn18
mitogenome	CM061060.1	122	107883	108003	16063048	16063165	rRNA	partial	rrn18
mitogenome	CM061060.1	5217	222566	227762	34717320	34712162	tRNA	partial	trnI-GAU
mitogenome	CM061060.1	287	222498	222782	12757540	12757264	tRNA	partial	trnI-GAU
mitogenome	CM061061.1	268	10773	11038	25876462	25876203	CDS	partial	atp6
mitogenome	CM061061.1	148	298262	298408	4737752	4737897	CDS	partial	atp8
mitogenome	CM061061.1	127	298854	298976	12881095	12880970	CDS	partial	atp8
mitogenome	CM061061.1	175	346108	346279	28790523	28790354	CDS	partial	ccmFN
mitogenome	CM061061.1	121	166667	166785	5706813	5706931	CDS	partial	nad9
mitogenome	CM061061.1	173	32505	32676	13023136	13022965	CDS	partial	orf116a
mitogenome	CM061061.1	40	300525	300563	27045347	27045386	CDS	partial	orf214
mitogenome	CM061061.1	213	107856	108067	12269789	12270000	rRNA	partial	rrn18
mitogenome	CM061061.1	79	42251	42329	28486078	28486001	tRNA	partial	trnE-UUC

[truncated: 2 more sheets: Table S11, Table S12]
